# Supplementary material for: Isolation and characterization of five novel probiotic strains from Korean infant and children faeces
Source: PubMed Central journal article supplement (PMC6822945; doi:10.1371/journal.pone.0223913), 2019-10-31
Supplement: pone.0223913.s001.pdf [file pone.0223913.s001.pdf]

**S1 Fig. Adherence of strains to Caco-2 cells**

|                                                 | Mean(Log CFU/ ml) | S.D   | S.E | Statistical method used | P value                                               | samples |
|-------------------------------------------------|-------------------|-------|-----|-------------------------|-------------------------------------------------------|---------|
| <i>L.GG</i> Initial cells                       | 9.205             | 0.006 |     |                         | **p<0.05,<br>***p<0.001 versus<br>initial cell number | 3       |
| <i>L.GG</i> Adhered cells                       | 7.049             | 0.036 |     |                         |                                                       | 3       |
| <i>E. faecalis</i> BioE EF71 Initial cells      | 9.139             | 0.044 |     |                         |                                                       | 3       |
| <i>E. faecalis</i> BioE EF71 Adhered cells      | 8.668             | 0.022 |     |                         |                                                       | 3       |
| <i>L. fermentum</i> BioE LF11 Initial cells     | 8.687             | 0.011 |     |                         |                                                       | 3       |
| <i>L. fermentum</i> BioE LF11 Adhered cells     | 7.198             | 0.033 |     |                         |                                                       | 3       |
| <i>L. paracasei</i> BioE LP08 Initial cells     | 9.618             | 0.008 |     |                         |                                                       | 3       |
| <i>L. paracasei</i> BioE LP08 Adhered cells     | 7.942             | 0.020 |     |                         |                                                       | 3       |
| <i>L. plantarum</i> BioE LPL59 Initial cells    | 8.948             | 0.074 |     |                         |                                                       | 3       |
| <i>L. plantarum</i> BioE LPL59 Adhered cells    | 8.404             | 0.008 |     |                         |                                                       | 3       |
| <i>S. thermophilus</i> BioE ST107 Initial cells | 9.321             | 0.018 |     |                         |                                                       | 3       |
| <i>S. thermophilus</i> BioE ST107 Adhered cells | 7.793             | 0.084 |     |                         |                                                       | 3       |
