# Supplementary material for: Isolation and characterization of five novel probiotic strains from Korean infant and children faeces
Source: PubMed Central journal article supplement (PMC6822945; doi:10.1371/journal.pone.0223913), 2019-10-31
Supplement: pone.0223913.s002.pdf [file pone.0223913.s002.pdf]

**S2 Fig. Cytokine levels.** (a) IL-6, (b) TNF- $\alpha$ , (c) IL-10.

| <b>(a) IL-6</b>        |                                   | Mean(pg/ml) | S.D  | S.E | Statistical method used | P value                                                                                                             | samples |
|------------------------|-----------------------------------|-------------|------|-----|-------------------------|---------------------------------------------------------------------------------------------------------------------|---------|
| Control                |                                   | 0.84        | 0.27 |     |                         | ***p<0.001 versus negative control                                                                                  | 3       |
| LPS                    |                                   | 83.10       | 3.42 |     |                         |                                                                                                                     | 3       |
| LPS+                   | <i>E. faecalis</i> KCTC3206       | 1.84        | 0.07 |     |                         | ###p<0.001 versus LPS-treated sample<br>\$\$p<0.01, \$\$\$p<0.001 versus KCTC registered strain of the same species | 3       |
|                        | <i>E. faecalis</i> BioE EF71      | 1.65        | 0.39 |     |                         |                                                                                                                     | 3       |
|                        | <i>L. fermentum</i> KCTC5048      | 42.01       | 4.42 |     |                         |                                                                                                                     | 3       |
|                        | <i>L. fermentum</i> BioE LF11     | 1.33        | 0.20 |     |                         |                                                                                                                     | 3       |
|                        | <i>L. paracasei</i> KCTC3265      | 0.47        | 0.11 |     |                         |                                                                                                                     | 3       |
|                        | <i>L. paracasei</i> BioE LP08     | 1.28        | 0.19 |     |                         |                                                                                                                     | 3       |
|                        | <i>L. plantarum</i> KCTC3108      | 11.40       | 0.67 |     |                         |                                                                                                                     | 3       |
|                        | <i>L. plantarum</i> BioE LPL59    | 29.82       | 3.84 |     |                         |                                                                                                                     | 3       |
|                        | <i>S. thermophilus</i> KCTC3658   | 1.42        | 1.31 |     |                         |                                                                                                                     | 3       |
|                        | <i>S. thermophilus</i> BioE ST107 | 11.03       | 5.44 |     |                         |                                                                                                                     | 3       |
| <i>L. rhamnosus</i> GG |                                   | 2.47        | 0.20 |     |                         | 3                                                                                                                   |         |

| <b>(b) TNF-<math>\alpha</math></b> |                                   | Mean(pg/ml) | S.D    | S.E | Statistical method used | P value                                                                                                             | samples |
|------------------------------------|-----------------------------------|-------------|--------|-----|-------------------------|---------------------------------------------------------------------------------------------------------------------|---------|
| Control                            |                                   | 203.43      | 39.87  |     |                         | ***p<0.001 versus negative control                                                                                  | 3       |
| LPS                                |                                   | 992.57      | 64.23  |     |                         |                                                                                                                     | 3       |
| LPS+                               | <i>E. faecalis</i> KCTC3206       | 515.39      | 168.50 |     |                         | ###p<0.001 versus LPS-treated sample<br>\$\$p<0.01, \$\$\$p<0.001 versus KCTC registered strain of the same species | 3       |
|                                    | <i>E. faecalis</i> BioE EF71      | 296.27      | 37.20  |     |                         |                                                                                                                     | 3       |
|                                    | <i>L. fermentum</i> KCTC5048      | 111.18      | 7.45   |     |                         |                                                                                                                     | 3       |
|                                    | <i>L. fermentum</i> BioE LF11     | 8.73        | 3.76   |     |                         |                                                                                                                     | 3       |
|                                    | <i>L. paracasei</i> KCTC3265      | 118.83      | 27.77  |     |                         |                                                                                                                     | 3       |
|                                    | <i>L. paracasei</i> BioE LP08     | 3.13        | 3.13   |     |                         |                                                                                                                     | 3       |
|                                    | <i>L. plantarum</i> KCTC3108      | 148.17      | 37.73  |     |                         |                                                                                                                     | 3       |
|                                    | <i>L. plantarum</i> BioE LPL59    | 492.27      | 8.28   |     |                         |                                                                                                                     | 3       |
|                                    | <i>S. thermophilus</i> KCTC3658   | 1031.47     | 259.82 |     |                         |                                                                                                                     | 3       |
|                                    | <i>S. thermophilus</i> BioE ST107 | 884.50      | 263.56 |     |                         |                                                                                                                     | 3       |
| <i>L. rhamnosus</i> GG             |                                   | 26.23       | 7.34   |     |                         | 3                                                                                                                   |         |

| <b>(c) IL-10</b>       |                                   | Mean(pg/ml) | S.D   | S.E | Statistical method used | P value                                                                                                           | samples |
|------------------------|-----------------------------------|-------------|-------|-----|-------------------------|-------------------------------------------------------------------------------------------------------------------|---------|
| Control                |                                   | 46.30       | 2.68  |     |                         | ***p<0.001 versus negative control                                                                                | 3       |
| LPS                    |                                   | 47.89       | 5.92  |     |                         |                                                                                                                   | 3       |
| LPS+                   | <i>E. faecalis</i> KCTC3206       | 79.88       | 23.13 |     |                         | ##p<0.01, ###p<0.001 versus LPS-treated sample<br>\$\$\$p<0.001 versus KCTC registered strain of the same species | 3       |
|                        | <i>E. faecalis</i> BioE EF71      | 42.35       | 18.21 |     |                         |                                                                                                                   | 3       |
|                        | <i>L. fermentum</i> KCTC5048      | 261.00      | 55.90 |     |                         |                                                                                                                   | 3       |
|                        | <i>L. fermentum</i> BioE LF11     | 208.51      | 19.01 |     |                         |                                                                                                                   | 3       |
|                        | <i>L. paracasei</i> KCTC3265      | 32.90       | 0.98  |     |                         |                                                                                                                   | 3       |
|                        | <i>L. paracasei</i> BioE LP08     | 1.65        | 0.65  |     |                         |                                                                                                                   | 3       |
|                        | <i>L. plantarum</i> KCTC3108      | 12.49       | 2.35  |     |                         |                                                                                                                   | 3       |
|                        | <i>L. plantarum</i> BioE LPL59    | 254.61      | 29.95 |     |                         |                                                                                                                   | 3       |
|                        | <i>S. thermophilus</i> KCTC3658   | 154.29      | 16.61 |     |                         |                                                                                                                   | 3       |
|                        | <i>S. thermophilus</i> BioE ST107 | 130.34      | 35.78 |     |                         |                                                                                                                   | 3       |
| <i>L. rhamnosus</i> GG |                                   | 8.54        | 1.77  |     |                         | 3                                                                                                                 |         |
